# Supplementary material for: Position effect, cryptic complexity, and direct gene disruption as disease mechanisms in de novo apparently balanced translocation cases
Source: PubMed Central journal article supplement (PMC6173455; doi:10.1371/journal.pone.0205298), 2018-10-05
Supplement: pone.0205298.s003.pdf [file pone.0205298.s003.pdf]

A)

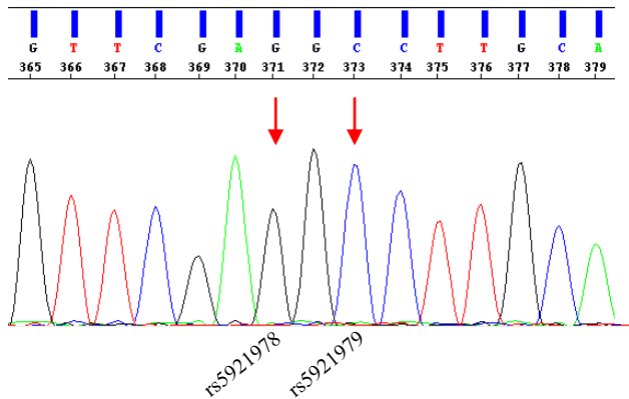

B)

```

1 CAGGCCGACGTGGGGTTGGCGCTGGGCACACTGTATGGTAACGTGTTCTC 50
  |||
1 CAGGCCGACGTGGGGTTGGCGCTGGGCACACTGTATGGTAACGTGTTCTC 50

51 GCAGACCACCATCTGCAGGTTCTGAAGGCTTGCAGCTGAGCTTCAAAAATA 100
  |||
51 GCAGACCACCATCTGCAGGTTCTGAGGCCTTGCAGCTGAGCTTCAAAAATA 100

101 TGTGCAAGCTGAAGCCCCTGCTGAACAAGTGGCTGGAGGAGGCGGATTTCG 150
  |||
101 TGTGCAAGCTGAAGCCCCTGCTGAACAAGTGGCTGGAGGAGGCGGATTTCG 150
  
```
